# Supplementary material for: Comparison of Acute Kidney Injury in Patients with COVID-19 and Other Respiratory Infections: A Prospective Cohort Study
Source: MDPI journal article supplement (doi:10.3390/jcm10112288), 2021-05-25
Supplement: s1 [file s1]

# Online-only supplement

Diebold M, Zimmermann T et al.

## Table of contents

|                                           |                 |
|-------------------------------------------|-----------------|
| <b><i>Online-only supplement.....</i></b> | <b><i>1</i></b> |
| <b><i>STROBE Statement .....</i></b>      | <b><i>2</i></b> |
| <b><i>Statistical Supplement.....</i></b> | <b><i>4</i></b> |
| <b><i>Missing values.....</i></b>         | <b><i>5</i></b> |
| <b><i>Study Flowchart .....</i></b>       | <b><i>7</i></b> |

# STROBE Statement

|                          | Item No | Recommendation                                                                                                                                                                                    | Provided on page |
|--------------------------|---------|---------------------------------------------------------------------------------------------------------------------------------------------------------------------------------------------------|------------------|
| Title and abstract       | 1       | (a) Indicate the study's design with a commonly used term in the title or the abstract                                                                                                            | 1                |
|                          |         | (b) Provide in the abstract an informative and balanced summary of what was done and what was found                                                                                               | 3                |
| Introduction             |         |                                                                                                                                                                                                   |                  |
| Background/rationale     | 2       | Explain the scientific background and rationale for the investigation being reported                                                                                                              | 4                |
| Objectives               | 3       | State specific objectives, including any prespecified hypotheses                                                                                                                                  | 4                |
| Methods                  |         |                                                                                                                                                                                                   |                  |
| Study design             | 4       | Present key elements of study design early in the paper                                                                                                                                           | 4                |
| Setting                  | 5       | Describe the setting, locations, and relevant dates, including periods of recruitment, exposure, follow-up, and data collection                                                                   | 4-6              |
| Participants             | 6       | (a) Give the eligibility criteria, and the sources and methods of selection of participants. Describe methods of follow-up                                                                        | 4-5              |
|                          |         | (b) For matched studies, give matching criteria and number of exposed and unexposed                                                                                                               | NA               |
| Variables                | 7       | Clearly define all outcomes, exposures, predictors, potential confounders, and effect modifiers. Give diagnostic criteria, if applicable                                                          | 7                |
| Data sources/measurement | 8       | For each variable of interest, give sources of data and details of methods of assessment (measurement). Describe comparability of assessment methods if there is more than one group              | 4-7              |
| Bias                     | 9       | Describe any efforts to address potential sources of bias                                                                                                                                         | 7-8              |
| Study size               | 10      | Explain how the study size was arrived at                                                                                                                                                         | NA               |
| Quantitative variables   | 11      | Explain how quantitative variables were handled in the analyses. If applicable, describe which groupings were chosen and why                                                                      | 7-8              |
| Statistical methods      | 12      | (a) Describe all statistical methods, including those used to control for confounding                                                                                                             | 7-8              |
|                          |         | (b) Describe any methods used to examine subgroups and interactions                                                                                                                               | 7-8              |
|                          |         | (c) Explain how missing data were addressed                                                                                                                                                       | 8                |
|                          |         | (d) If applicable, explain how loss to follow-up was addressed                                                                                                                                    | 7                |
|                          |         | (e) Describe any sensitivity analyses                                                                                                                                                             | 8                |
| Results                  |         |                                                                                                                                                                                                   |                  |
| Participants             | 13      | (a) Report numbers of individuals at each stage of study—eg numbers potentially eligible, examined for eligibility, confirmed eligible, included in the study, completing follow-up, and analysed | 8, Figure S1     |

|                          |    |                                                                                                                                                                                                              |                    |
|--------------------------|----|--------------------------------------------------------------------------------------------------------------------------------------------------------------------------------------------------------------|--------------------|
|                          |    | (b) Give reasons for non-participation at each stage                                                                                                                                                         | Figure S1          |
|                          |    | (c) Consider use of a flow diagram                                                                                                                                                                           | Figure S1          |
| Descriptive data         | 14 | (a) Give characteristics of study participants (eg demographic, clinical, social) and information on exposures and potential confounders                                                                     | 8-9, Table 1 and 2 |
|                          |    | (b) Indicate number of participants with missing data for each variable of interest                                                                                                                          | Table S1           |
|                          |    | (c) Summarise follow-up time (eg, average and total amount)                                                                                                                                                  | 10                 |
| Outcome data             | 15 | Report numbers of outcome events or summary measures over time                                                                                                                                               | 8-11               |
| Main results             | 16 | (a) Give unadjusted estimates and, if applicable, confounder-adjusted estimates and their precision (eg, 95% confidence interval). Make clear which confounders were adjusted for and why they were included | 10, Table 3        |
|                          |    | (b) Report category boundaries when continuous variables were categorized                                                                                                                                    | NA                 |
|                          |    | (c) If relevant, consider translating estimates of relative risk into absolute risk for a meaningful time period                                                                                             | NA                 |
| Other analyses           | 17 | Report other analyses done—eg analyses of subgroups and interactions, and sensitivity analyses                                                                                                               | 10-11              |
| <b>Discussion</b>        |    |                                                                                                                                                                                                              |                    |
| Key results              | 18 | Summarise key results with reference to study objectives                                                                                                                                                     | 11                 |
| Limitations              | 19 | Discuss limitations of the study, taking into account sources of potential bias or imprecision. Discuss both direction and magnitude of any potential bias                                                   | 13-14              |
| Interpretation           | 20 | Give a cautious overall interpretation of results considering objectives, limitations, multiplicity of analyses, results from similar studies, and other relevant evidence                                   | 14                 |
| Generalisability         | 21 | Discuss the generalisability (external validity) of the study results                                                                                                                                        | 12                 |
| <b>Other information</b> |    |                                                                                                                                                                                                              |                    |
| Funding                  | 22 | Give the source of funding and the role of the funders for the present study and, if applicable, for the original study on which the present article is based                                                | 15                 |

Supplemental table S1 STROBE Statement Checklist

# Statistical Supplement

List of used R packages:

- foreign
- haven
- tidyverse
- tableone
- flextable
- officer
- rms
- survminer
- openxlsx
- dplyr
- chisq.posthoc.test
- transplantr
- ggplot2
- scales
- mice
- cmprsk
-

## Missing values

|                        | Missing<br>values<br>n | Missing<br>values<br>% |
|------------------------|------------------------|------------------------|
| Age                    | 0                      | 0                      |
| Female                 | 0                      | 0                      |
| Valvular Cardiopathy   | 0                      | 0                      |
| Coronary heart disease | 0                      | 0                      |
| Atrial fibrillation    | 0                      | 0                      |
| Hypertension           | 0                      | 0                      |
| Smoker                 | 0                      | 0                      |
| CKD                    | 0                      | 0                      |
| Dialysis               | 0                      | 0                      |
| Diabetes               | 0                      | 0                      |
| Obesity                | 0                      | 0                      |
| Stroke                 | 0                      | 0                      |
| Hepatopathy            | 0                      | 0                      |
| Cancer                 | 0                      | 0                      |
| Pneumopathy            | 0                      | 0                      |
| Asthma                 | 0                      | 0                      |
| COPD                   | 0                      | 0                      |
| Ace-Inhibitor          | 0                      | 0                      |
| ARB                    | 0                      | 0                      |
| Diuretics              | 0                      | 0                      |
| Hemoglobin             | 14                     | 3                      |
| Leukocytes             | 14                     | 3                      |
| Lymphocytes            | 18                     | 4                      |
| Thrombocytes           | 14                     | 3                      |
| C-reactive protein     | 16                     | 3                      |
| D-dimers               | 41                     | 8                      |
| Ferritin               | 39                     | 8                      |
| Creatinine kinase      | 15                     | 3                      |
| Creatinine             | 14                     | 3                      |
| Urea                   | 16                     | 3                      |
| Sodium                 | 14                     | 3                      |
| Potassium              | 14                     | 3                      |
| LDH                    | 46                     | 9                      |
| NEWS Score             | 45                     | 9                      |
| BD systolic            | 44                     | 9                      |
| NEWS Score             | 45                     | 9                      |
| BD diastolic           | 53                     | 10                     |
| Hf                     | 31                     | 6                      |
| SpO2                   | 27                     | 5                      |
| Respiratory Rate       | 33                     | 7                      |

**Supplemental Table S1** Missing values



# Study Flowchart

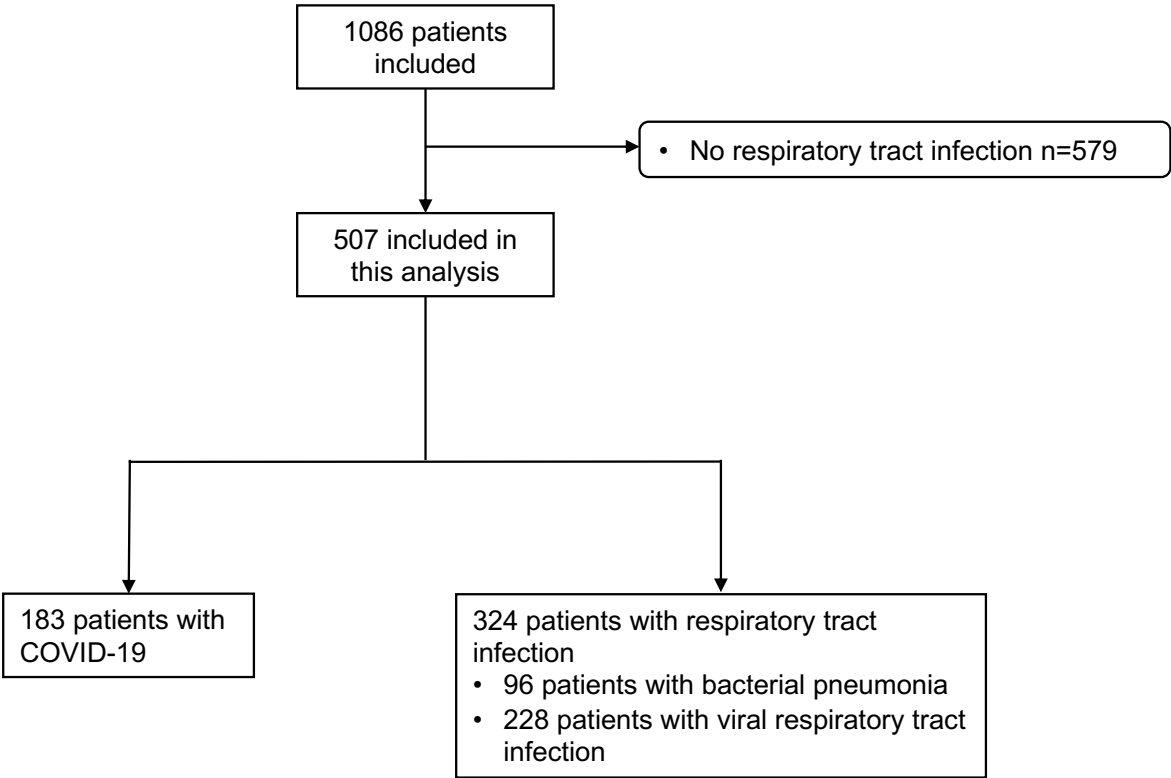

**Figure S1** Study Flowchart
